# Supplementary material for: Correlation between Statin Solubility and Mortality in Patients on Chronic Hemodialysis
Source: MDPI journal article supplement (doi:10.3390/diagnostics13203290), 2023-10-23
Supplement: s1 [file s1]

## **Supplementary materials**

**Table S1.** Medication types and Health Insurance Review and Assessment Service codes

**Table S2.** The ICD–10 codes were used in Charlson Comorbidity Index

**Figure S1.** Forest plots of the HR and 95% CI according to subgroups

**Table S1. Medication types and Health Insurance Review and Assessment Service codes**

| <b>Medications</b>                                | <b>Codes</b>                                                                                                                                                                                         |
|---------------------------------------------------|------------------------------------------------------------------------------------------------------------------------------------------------------------------------------------------------------|
| <b>Acepril</b>                                    | 104201ATB, 104202ATB                                                                                                                                                                                 |
| <b>Amlodipine</b>                                 | 495901ATB, 459802ACH, 483201ATB, 486501ATB, 107601ATB, 107601ATD, 459801ACH, 459801ATB, 459901ATB, 464601ATB, 470801ATB, 476201ATB, 479701ATB, 483202ATB, 486502ATB, 107602ATB, 107602ATD, 470802ATB |
| <b>Amlodipine+Atorvastatin</b>                    | 614500ATB, 472300ATB472400ATB472500ATB518900ATB                                                                                                                                                      |
| <b>Amlodipine+Losartan+Chlorthalidone</b>         | 662800ATB, 662900ATB, 663000ATB                                                                                                                                                                      |
| <b>Amlodipine+Losartan+Rosuvastatin</b>           | 663900ATB, 664000ATB, 664100ATB, 664200ATB, 664300ATB, 664400ATB                                                                                                                                     |
| <b>Amlodipine+Olmesartan+Rosuvastatin</b>         | 677300ATB, 677400ATB, 677500ATB, 677600ATB                                                                                                                                                           |
| <b>Amlodipine+Rosuvastatin</b>                    | 673900ATB, 674000ATB, 674100ATB                                                                                                                                                                      |
| <b>Amlodipine+Rosuvastatin+Telmisartan</b>        | 671200ATB, 671300ATB, 671400ATB, 671500ATB, 677000ATB, 677100ATB, 671600ATB, 671700ATB                                                                                                               |
| <b>Amlodipine+Telmisartan+Hydrochlorothiazide</b> | 663500ATB, 663600ATB, 663700ATB, 663800ATB                                                                                                                                                           |
| <b>Amosulalol</b>                                 | 107901ATB, 107902ATB                                                                                                                                                                                 |
| <b>Arotinolol</b>                                 | 110202ATB, 110201ATB                                                                                                                                                                                 |
| <b>Atenolol</b>                                   | 483102ATB, 111402ATB, 483101ATB, 111403ATB, 111401ATB                                                                                                                                                |
| <b>Atenolol+Chlorthalidone</b>                    | 262100ATB, 460200ATB                                                                                                                                                                                 |
| <b>Azilsartan</b>                                 | 662401ATB, 662403ATB, 662402ATB                                                                                                                                                                      |
| <b>Azilsartan+Chlorthalidone</b>                  | 673500ATB, 673600ATB                                                                                                                                                                                 |
| <b>Barnidipine</b>                                | 114003ACH, 114001ACH, 114002ACH                                                                                                                                                                      |
| <b>Benidipine</b>                                 | 115101ATB, 115102ATB, 115104ATB, 115103ATB                                                                                                                                                           |
| <b>Betaxolol</b>                                  | 116801ATB, 116803ATB                                                                                                                                                                                 |
| <b>Bevantolol</b>                                 | 117002ATB, 117001ATB                                                                                                                                                                                 |
| <b>Bisoprolol</b>                                 | 117904ATB, 117903ATB, 117902ATB, 117901ATB                                                                                                                                                           |
| <b>Bisoprolol+Hydrochlorothiazide</b>             | 469800ATB, 470000ATB, 469900ATB                                                                                                                                                                      |

|                                        |                                                                                                              |
|----------------------------------------|--------------------------------------------------------------------------------------------------------------|
| <b>Candesartan</b>                     | 122601ATB, 122602ATB, 122603ATB                                                                              |
| <b>Candesartan+Amlodipine</b>          | 652900ATB, 653000ATB, 653100ATB                                                                              |
| <b>Candesartan+Hydrochlorothiazide</b> | 423700ATB                                                                                                    |
| <b>Candesartan+Rosuvastatin</b>        | 661800ATB, 661900ATB, 673700ATB, 662000ATB, 662100ATB                                                        |
| <b>Captopril</b>                       | 122901ATB, 122902ATB, 122903ATB                                                                              |
| <b>Captopril+Hydrochlorothiazide</b>   | 262200ATB, 262300ATB                                                                                         |
| <b>Carteolol</b>                       | 124801ATB                                                                                                    |
| <b>Carvedilol</b>                      | 125005ATB, 125003ATB, 662201ATB, 125008ACR, 125001ATB, 662202ATB, 125007ACR, 125002ATB, 125006ACR, 125004ACR |
| <b>Celiprolol</b>                      | 129101ATB                                                                                                    |
| <b>Cilazapril</b>                      | 133001ATB, 133002ATB, 133003ATB                                                                              |
| <b>Cilnidipine</b>                     | 133102ATB, 133101ATB                                                                                         |
| <b>Clonidine</b>                       | 136505ATR                                                                                                    |
| <b>Diltiazem</b>                       | 145706ATB, 145707ACR, 145707ATR, 145703ACR, 145706ATR, 145707ATB                                             |
| <b>Doxazocin</b>                       | 149101ATB, 149102ATB, 149104ATR, 149103ATB                                                                   |
| <b>Efonidipine</b>                     | 441202ATB, 441201ATB                                                                                         |
| <b>Enalapril</b>                       | 151603ATB, 151601ATB                                                                                         |
| <b>Enalapril+Hydrochlorothiazide</b>   | 453700ATB, 440300ATB                                                                                         |
| <b>Eprosartan</b>                      | 429201ATB                                                                                                    |
| <b>Eprosartan+Hydrochlorothiazide</b>  | 460500ATB                                                                                                    |
| <b>Felodipine</b>                      | 157503ATR, 157501ATR                                                                                         |
| <b>Felodipine+Metoprolol</b>           | 262400ATR                                                                                                    |
| <b>Fimasartan</b>                      | 515203ATB, 515201ATB, 515202ATB                                                                              |
| <b>Fimasartan+Amlodipine</b>           | 651900ATB, 652000ATB, 652700ATB, 652100ATB                                                                   |
| <b>Fimasartan+Hydrochlorothiazide</b>  | 522000ATB, 526800ATB                                                                                         |
| <b>Fimasartan+Rosuvastatin</b>         | 655000ATB, 654900ATB, 654800ATB, 654700ATB, 654600ATB                                                        |
| <b>Fosinopril</b>                      | 163501ATB, 163502ATB                                                                                         |

|                                       |                                                                                        |
|---------------------------------------|----------------------------------------------------------------------------------------|
| <b>Hydralazine</b>                    | 170701ATB                                                                              |
| <b>Imidapril</b>                      | 173402ATB, 173401ATB                                                                   |
| <b>Irbesartan</b>                     | 177301ATB, 177303ATB                                                                   |
| <b>Irbesartan+Atorvastatin</b>        | 524000ATB, 524100ATB, 527100ATB, 527000ATB                                             |
| <b>Irbesartan+Hydrochlorothiazide</b> | 385700ATB, 385800ATB, 553800ATB                                                        |
| <b>Lacidipine</b>                     | 180301ATB, 180302ATB, 180303ATB                                                        |
| <b>Lercanidipine</b>                  | 182001ATB, 182002ATB                                                                   |
| <b>Lisinopril</b>                     | 184501ATB                                                                              |
| <b>Lisinopril+Hydrochlorothiazide</b> | 499200ATB, 499300ATB                                                                   |
| <b>Losartan</b>                       | 185701ATB, 185702ATB                                                                   |
| <b>Losartan+Amlodipine</b>            | 503000ATB, 637400ATB, 513900ATB, 637500ATB, 502700ATB, 637600ATB                       |
| <b>Losartan+Hydrochlorothiazide</b>   | 262500ATB, 486900ATB, 378900ATB                                                        |
| <b>Manidipine</b>                     | 188001ATB, 188002ATB                                                                   |
| <b>Metoprolol</b>                     | 194003ATR, 193802ATB, 262400ATR                                                        |
| <b>Metoprolol+Hydrochlorothiazide</b> | 262600ATB                                                                              |
| <b>Metoprolol+felodipine</b>          | 262400ATR                                                                              |
| <b>Minoxidil</b>                      | 196102ATB                                                                              |
| <b>Nadolol</b>                        | 198301ATB                                                                              |
| <b>Nebivolol</b>                      | 489501ATB, 489502ATB, 489503ATB                                                        |
| <b>Nicardipine</b>                    | 201003ACR, 201002ATB                                                                   |
| <b>Nifedipine</b>                     | 201407ACS, 201405ATR, 528201ATR, 201409ATR, 528202ATR, 201401ACS, 201401ATB, 201408ATR |
| <b>Nimodipine</b>                     | 201901ATB, 356202ATR, 356203ATR, 356201ATB, 356202ATB                                  |
| <b>Nisoldipine</b>                    | 356202ATR                                                                              |
| <b>Olmesartan</b>                     | 468502ATB, 468501ATB, 468503ATB, 520902ATB, 520901ATB                                  |

|                                                  |                                                                                                                                                                                           |
|--------------------------------------------------|-------------------------------------------------------------------------------------------------------------------------------------------------------------------------------------------|
| <b>Olmesartan+Amlodipine</b>                     | 547800ATB, 632800ATB, 500500ATB, 547700ATB, 629500ATB, 631300ATB, 500600ATB, 547900ATB, 632900ATB, 547600ATB, 548000ATB, 582200ATB, 629600ATB, 633000ATB, 547500ATB, 582400ATB, 629400ATB |
| <b>Olmesartan+Amlodipine+Hydrochlorothiazide</b> | 519800ATB, 519700ATB, 520100ATB, 520000ATB, 519900ATB                                                                                                                                     |
| <b>Olmesartan+Hydrochlorothiazide</b>            | 513600ATB, 489100ATB                                                                                                                                                                      |
| <b>Olmesartan+Rosuvastatin</b>                   | 644200ATB, 644100ATB, 526900ATB, 526300ATB, 526400ATB, 653200ATB, 526500ATB                                                                                                               |
| <b>Perindopril</b>                               | 211301ATB, 501601ATB, 211302ATB, 501602ATB                                                                                                                                                |
| <b>Perindopril+Indapamide</b>                    | 556200ATB                                                                                                                                                                                 |
| <b>Propranolol</b>                               | 219901ATB, 219904ATB, 219906ACR, 219905ACR                                                                                                                                                |
| <b>Quinapril</b>                                 | 221901ATB                                                                                                                                                                                 |
| <b>Ramipril</b>                                  | 222401ATB, 222402ATB, 222404ATB                                                                                                                                                           |
| <b>Ramipril+Felodipine</b>                       | 447100ATB, 447200ATB                                                                                                                                                                      |
| <b>Ramipril+Hydrochlorothiazide</b>              | 448600ATB, 448700ATB                                                                                                                                                                      |
| <b>Telmisartan</b>                               | 378801ATB, 378802ATB, 378803ATB                                                                                                                                                           |
| <b>Telmisartan+Amlodipine</b>                    | 521200ATB, 511600ATB, 521300ATB, 511700ATB, 521400ATB, 511500ATB, 644800ATB, 623100ATB                                                                                                    |
| <b>Telmisartan+Hydrochlorothiazide</b>           | 443200ATB, 443300ATB, 502600ATB                                                                                                                                                           |
| <b>Telmisartan+Rosuvastatin</b>                  | 631600ATB, 629900ATB, 630000ATB, 631700ATB, 630100ATB, 630200ATB                                                                                                                          |
| <b>Temocapril</b>                                | 235002ATB                                                                                                                                                                                 |
| <b>Terazosin</b>                                 | 235501ATB, 235502ATB, 235503ATB, 616501ATB                                                                                                                                                |
| <b>Valsartan</b>                                 | 247103ATB, 247101ATB, 247102ATB, 247104ATB                                                                                                                                                |
| <b>Valsartan+Amlodipine</b>                      | 522600ATB, 492900ATB, 522900ATB, 523200ATB, 522700ATB, 492800ATB, 522800ATB, 523000ATB, 523300ATB, 495800ATB, 523100ATB, 523400ATB                                                        |
| <b>Valsartan+Hydrochlorothiazide</b>             | 356400ATB, 442600ATB                                                                                                                                                                      |
| <b>Valsartan+Lercanidipine</b>                   | 522200ATB, 522300ATB, 522400ATB                                                                                                                                                           |
| <b>Valsartan+Pitavastatin</b>                    | 635000ATB, 635200ATB, 634900ATB, 635100ATB                                                                                                                                                |

|                                           |                                                                                                              |
|-------------------------------------------|--------------------------------------------------------------------------------------------------------------|
| <b>Valsartan+Rosuvastatin</b>             | 629700ATB, 525000ATB, 525200ATB, 629800ATB, 525100ATB, 525300ATB                                             |
| <b>Valsartan+Sacubitril</b>               | 651401ATB, 651402ATB, 651403ATB                                                                              |
| <b>Verapamil</b>                          | 247606ATB, 247607ATB, 247603ATR, 247605ATR, 247601ACR                                                        |
| <b>Zofenopril</b>                         | 510401ATB, 510402ATB, 510403ATB                                                                              |
| <b>Atorvastatin+Amlodipine</b>            | 472300ATB, 472400ATB                                                                                         |
| <b>Atorvastatin+Ezetimibe</b>             | 633800ATB, 633900ATB, 634800ATB                                                                              |
| <b>Pitavastatin+Fenofibrate</b>           | 679300ACH                                                                                                    |
| <b>Rosuvastatin+Ezetimibe</b>             | 640700ATB, 640800ATB, 640900ATB                                                                              |
| <b>Rosuvastatin+Ezetimibe+Telmisartan</b> | 671400ATB, 671500ATB, 671700ATB                                                                              |
| <b>Aspirin</b>                            | 110701ATB, 110702ATB, 110801ATB, 110802ATB, 111001ACE, 111001ATB, 111001ATE, 111002ATE, 111003ACE, 111003ATE |
| <b>Clopidogrel</b>                        | 133201ACR, 133201ATB, 133201ATR, 133202ATB, 133203ATR, 506100ATB                                             |
| <b>Cilostazol</b>                         | 136901ATB, 492501ATB, 495201ATB, 498801ATB, 501501ATB                                                        |
| <b>Ticlopidine</b>                        | 498900ATB, 239201ATB, 239202ATB                                                                              |
| <b>Aspirin+Bethocarbamol</b>              | 256800ATB                                                                                                    |
| <b>Aspirin+Clopidogrel</b>                | 517900ACH, 517900ACE, 517900ATE, 667500ACE                                                                   |
| <b>Aspirin+Dipyridamole</b>               | 489700ACR                                                                                                    |
| <b>Atorvastatin 10mg</b>                  | 111501ATB, 502201ATB, 633800ATB, 472300ATB, 524000ATB, 527100ATB, 614500ATB, 671800ATR, 671900ATR, 673800ATR |
| <b>Atorvastatin 20mg</b>                  | 111502ATB, 502202ATB, 633900ATB, 472400ATB, 518900ATB, 524100ATB, 527000ATB, 672000ATR, 672100ATR            |
| <b>Atorvastatin 40mg</b>                  | 111503ATB, 502203ATB, 634800ATB, 472500ATB,                                                                  |
| <b>Atorvastatin 80mg</b>                  | 111504ATB, 502204ATB                                                                                         |
| <b>Fluvastatin 20mg</b>                   | 162401ACH                                                                                                    |
| <b>Fluvastatin 40mg</b>                   | 162402ACH                                                                                                    |
| <b>Fluvastatin 80mg</b>                   | 162403ATR                                                                                                    |
| <b>Lovastatin 20mg</b>                    | 185801ATB                                                                                                    |

|                          |                                                                                                                                                                                                                                                              |
|--------------------------|--------------------------------------------------------------------------------------------------------------------------------------------------------------------------------------------------------------------------------------------------------------|
| <b>Pitavastatin 1mg</b>  | 470902ATB                                                                                                                                                                                                                                                    |
| <b>Pitavastatin 2mg</b>  | 470901ATB, 634900ATB, 635000ATB                                                                                                                                                                                                                              |
| <b>Pitavastatin 4mg</b>  | 470903ATB, 635100ATB, 635200ATB                                                                                                                                                                                                                              |
| <b>Pravastatin 5mg</b>   | 216602ATB                                                                                                                                                                                                                                                    |
| <b>Pravastatin 10mg</b>  | 216601ATB                                                                                                                                                                                                                                                    |
| <b>Pravastatin 20mg</b>  | 216603ATB                                                                                                                                                                                                                                                    |
| <b>Pravastatin 40mg</b>  | 216604ATB, 519300ACH                                                                                                                                                                                                                                         |
| <b>Rosuvastatin 5mg</b>  | 454003ATB, 640700ATB, 663400ACS, 526900ATB, 629700ATB, 629800ATB, 631600ATB, 631700ATB, 644200ATB, 654800ATB, 655000ATB, 661800ATB, 663900ATB, 664200ATB, 671200ATB, 671300ATB, 664600ATB, 631600ATB, 631700ATB, 673700ATB, 673900ATB, 672500ATR, 672600ATR, |
| <b>Rosuvastatin 10mg</b> | 454001ATB, 640800ATB, 525000ATB, 525100ATB, 526300ATB, 629900ATB, 630100ATB, 644100ATB, 653200ATB, 654700ATB, 654900ATB, 661900ATB, 662000ATB, 664000ATB, 664300ATB, 671400ATB, 671500ATB, 671600ATB, 664700ATB, 674000ATB, 672700ATR, 672800ATR             |
| <b>Rosuvastatin 20mg</b> | 454002ATB, 640900ATB, 525200ATB, 525300ATB, 526400ATB, 526500ATB, 630000ATB, 630200ATB, 654600ATB, 622100ATB, 664100ATB, 664400ATB, 671700ATB, 664800ATB, 674100ATB, 672900ATR, 673000ATR                                                                    |
| <b>Simvastatin 5mg</b>   | 227806ATB                                                                                                                                                                                                                                                    |
| <b>Simvastatin 10mg</b>  | 471000ATB, 227803ATB,                                                                                                                                                                                                                                        |
| <b>Simvastatin 20mg</b>  | 227801ATB, 227801ATR, 471100ATB, 631400ATB,                                                                                                                                                                                                                  |
| <b>Simvastatin 40mg</b>  | 227802ATB, 507800ATB, 631500ATB                                                                                                                                                                                                                              |
| <b>Simvastatin 80mg</b>  | 227805ATB                                                                                                                                                                                                                                                    |

**Table S2. The ICD–10 codes were used in Charlson Comorbidity Index**

| <b>Comorbidities</b>             | <b>Codes</b>                                                                             | <b>Score</b> |
|----------------------------------|------------------------------------------------------------------------------------------|--------------|
| Myocardial infarction            | I21, I22, I252                                                                           | 1            |
| Congestive heart failure         | I43, I50, I099, I110, I130, I132, I255, I420, I425-I429, P290                            | 1            |
| Peripheral vascular disease      | I70, I71, I731, I738, I739, I771, I790, I792, K551, K558, K559, Z958, Z959               | 1            |
| Cerebrovascular disease          | G45, G46, I60-69, H340                                                                   | 1            |
| Dementia                         | F00-03, G30, F051, G311                                                                  | 1            |
| Chronic pulmonary disease        | J40-47, J60-67, I278-279, J701, J703, J684                                               | 1            |
| Rheumatologic disease            | M05–06, M32–34, M315, M351, M353, M360                                                   | 1            |
| Peptic ulcer disease             | K25–28                                                                                   | 1            |
| Mild liver disease               | B18, K73, 74, K700-703, K709, K713-715, K717, K760, K762-764, K768–769, Z944             | 1            |
| DM without complication          | E100-101, E106, E108-111, E116, E118-121, E126, E128-131, E136, E138-141, E146, E148-149 | 1            |
| DM with complication             | E102-105, E107, E112-115, E117, E122-125, E127, E132-135, E137, E142-145, E147           | 2            |
| Hemiplegia or paraplegia         | G81-82, G041, G114, G800, G830-834, G839                                                 | 2            |
| Any malignancy                   | C00-26, C30-C34, C37-41, C43, C45-58, C60-6, C81-88, C90-97                              | 2            |
| Moderate to severe liver disease | I850, I859, I864, I982, K704, K711, K721, K729, K765-767                                 | 3            |
| Metastatic tumor                 | C77-80                                                                                   | 6            |
| AIDS/HIV                         | B20-22, B24.                                                                             | 6            |

Abbreviations: ICD–10, International Classification of Diseases, 10th revision, Clinical Modification; DM, diabetes mellitus; AIDS/HIV, acquired immune deficiency syndrome/human immunodeficiency virus



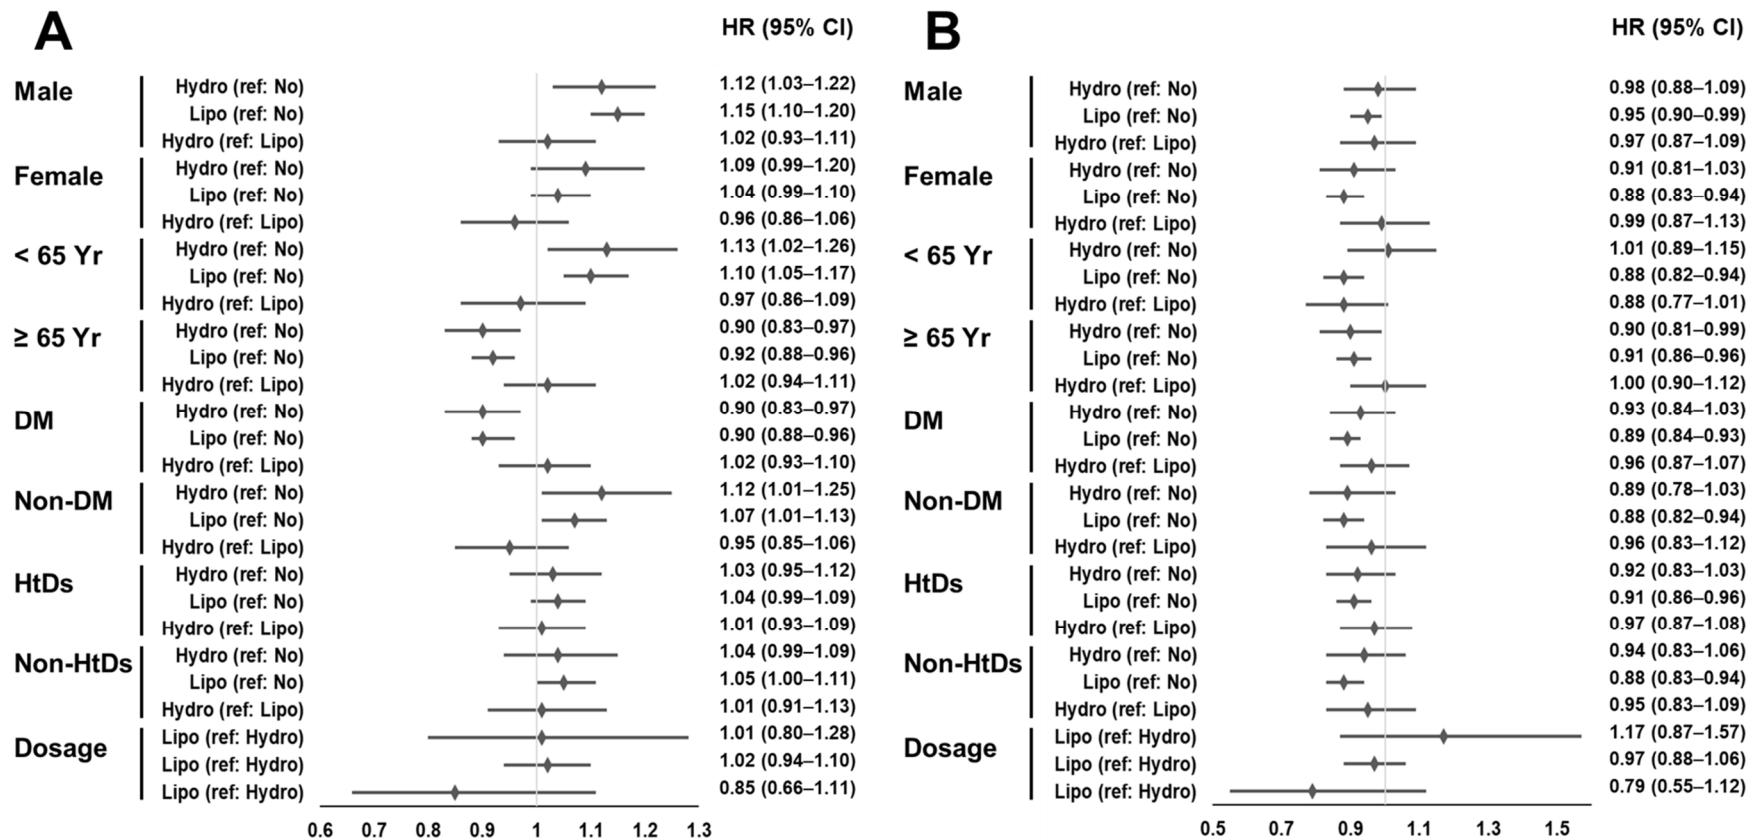

**Figure S1. Forest plots of the HR and 95% CI according to subgroups**

(A) Univariate Cox regression analysis (B) Multivariable Cox regression analyses. Adjustment according to age, sex, underlying cause of end-stage renal disease, Charlson comorbidity index score, type of vascular access, hemodialysis vintage, ultrafiltration volume, Kt/V<sub>urea</sub>, hemoglobin, serum albumin, serum creatinine, serum phosphorus, serum calcium, systolic blood pressure, diastolic blood pressure, the use of

renin-angiotensin system blockers, clopidogrel, and aspirin, and myocardial infarction or congestive heart failure, and dosage of statin. In dosage category, reference was hydrophilic statin, and upper, middle, and low compartments reveal low, moderate, and high dosage subgroups.

**Abbreviations:** CI, confidence interval; DM, diabetes mellitus; No, patients without prescription of statins; Hydro, patients with prescription of hydrophilic statins; Lipo, patients with prescription of lipophilic statins; HR, hazard ratio; HtDs, patients with myocardial infarction or congestive heart failure; Non-HtDs, patients without myocardial infarction and congestive heart failure; Yr, years.
